# Supplementary material
Source: PubMed Central journal article supplement (PMC5360480)
Supplement: NIHMS847214-supplement-1.pdf [file NIHMS847214-supplement-1.pdf]

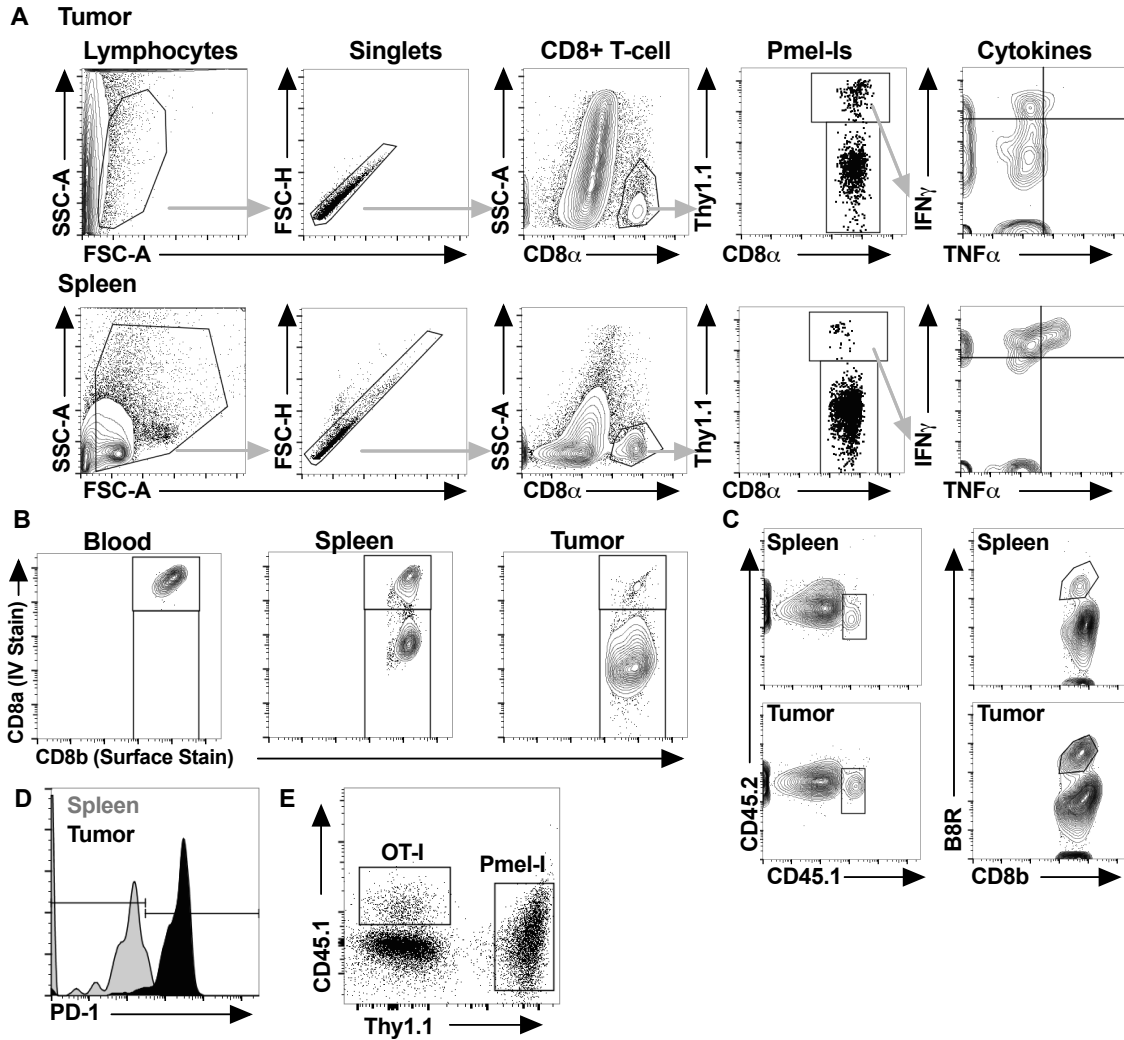

**Supplemental figure 1: Representative gating strategies for CD8<sup>+</sup> T cells recovered from blood, tumors and spleens.** A) Identification and functional analysis of Pmel-I<sup>s</sup> from spleens and tumors from Fig. 1 and 3 was accomplished as shown. B) Representative IV CD8 $\alpha$  staining in the blood, spleen and tumor for Fig. 1, 2, 5, and 6. C) Representative identification of OT-I<sup>s</sup> and B8R-specific CD8<sup>+</sup> T cells for Fig. 5 and 6. D) Representative PD-1 gating of Pmel-I<sup>s</sup> in the spleen and tumor for Fig. 3, 4, 5, 6, 7. E) Representative gating for mixed OT-I (CD45.1<sup>+</sup>) and Pmel-I (Thy1.1<sup>+</sup>) in the tumor for Fig. 4.

**A Pmel-I Function @ D7 P.I.**

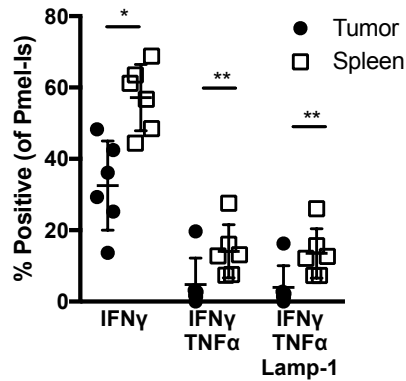

**B M45 Function @ D7 P.I.**

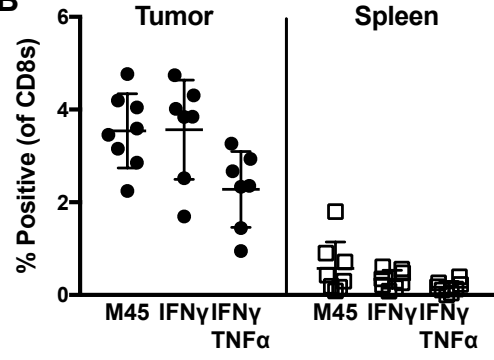

**M38 Function @ D7 P.I.**

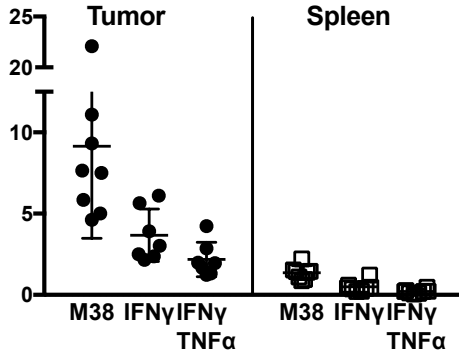

**Supplemental figure 2: Function and PD-1 expression of TAA-specific and non-specific CD8<sup>+</sup> T cells in the tumor and blood.** A) 10<sup>4</sup> Pmel-I<sub>s</sub> (Thy1.1<sup>+</sup>) were transferred into naïve C57B6/J mice (Thy1.2<sup>+</sup>) on D-1, given 1 x 10<sup>5</sup> B16F0s on D0, and infected with MCMV-gp100 on D5. Shown is the function (cytokine production and degranulation) of Pmel-I<sub>s</sub> in the tumor and spleen seven days post infection after *ex vivo* gp100 stimulation (n=6, 2 experiments). B) Cytokine-producing CD8<sup>+</sup> T cells were enumerated after *ex vivo* peptide stimulation (n=10) and compared to tetramer-binding cells in the tumor and spleen after MCMV-gp100 infection (mice from Fig. 1 and 3).

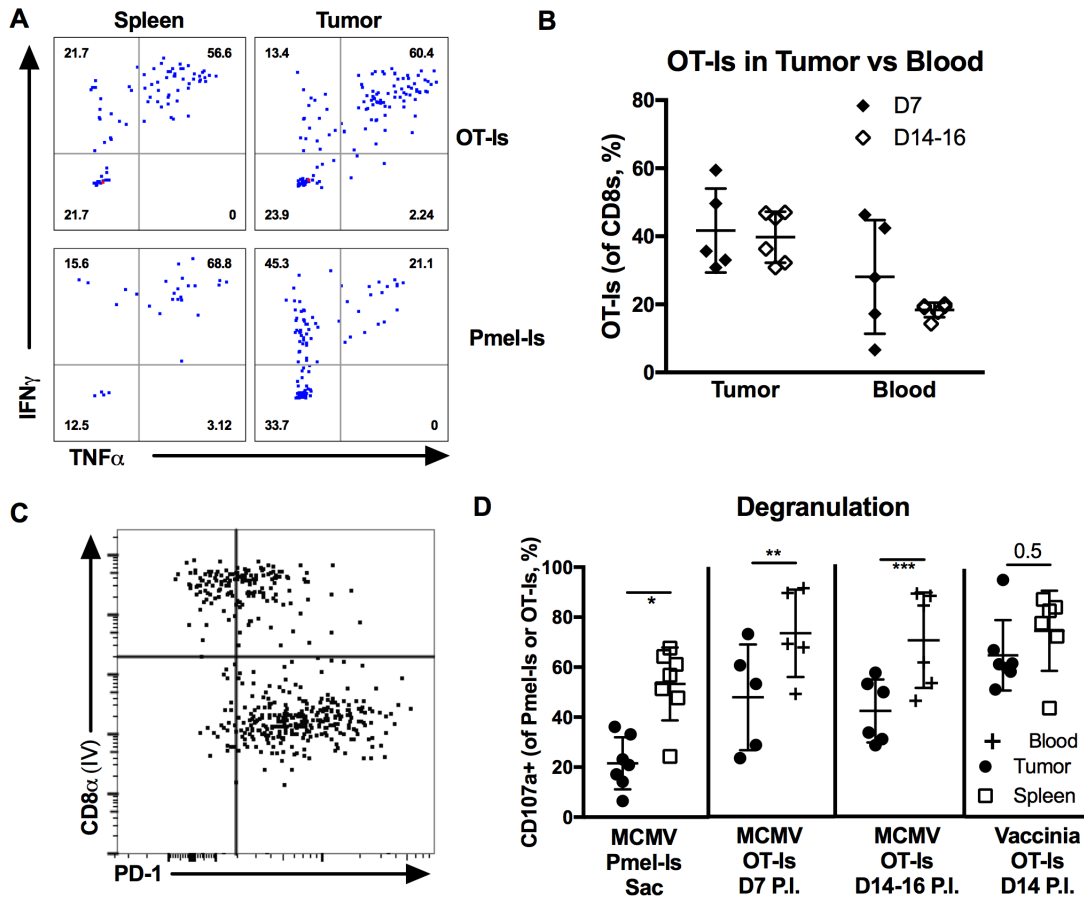

**Supplemental Figure 3: Purified virus-specific CD8<sup>+</sup> TIL are more functional than purified TAA-specific CD8<sup>+</sup> TIL.**

A) To test the function of CD8<sup>+</sup> TIL after isolation from the tumor milieu, we used a co-adoptive transfer system that enabled analyses of both TAA-specific and virus-specific T cells from the same tumor simultaneously. We co-transferred OT-I (CD45.1<sup>+</sup>) and Pmel-I (Thy1.1<sup>+</sup>) TCR transgenic T cells into B6 mice (CD45.2<sup>+</sup>, Thy1.2<sup>+</sup>) on D-1, implanted B16F0 tumors on D0 and co-infected with MCMV-SL8 and MCMV-gp100 on D5 to drive the expansion of both OT-I and Pmel-I T cells. When tumors were >100 mm<sup>2</sup>, CD8<sup>+</sup> TIL were enriched from the tumor homogenate with magnetic beads as described in the methods before stimulation with the SIINFEKL or gp100 peptide in the presence of M2-10B4 fibroblasts as APCs. Pmel-I isolated from the tumor were more functional than Pmel-I stimulated within the impure tumor homogenate (compare to Figure 3A). Nevertheless, these Pmel-I remained markedly less functional than Pmel-I recovered from the spleens of the same animals. In contrast, equivalent proportions of OT-I isolated from the tumor and the spleen produced IFN- $\gamma$  and TNF- $\alpha$ . B-C) Mice are from Fig. 3D-F. Shown is (C) the representative PD-1 expression of OT-I that were labeled (tissue) or unlabeled (vasculature) by IV CD8 $\alpha$  antibody, on D7 P.I. D) CD107a (Lamp-1,

degranulation) exposure after *ex vivo* peptide stimulation of tumor and virus-specific CD8s in the tumor, blood and spleen at different times post MCMV or VacV infections (same mice as Fig. 3 and 5).

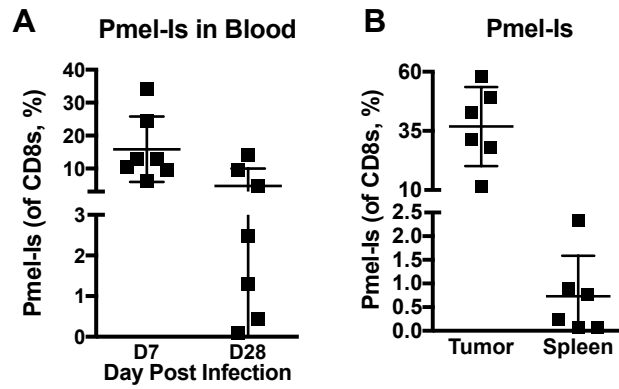

**Supplemental figure 4: Pmel-Is in the blood, tumor and spleen at various time-points.** From Fig. 6A and B. Shown is the frequency of Pmel-Is among CD8<sup>+</sup> T cells (A) in the blood before tumor implantation and (B) in the tumor and spleen 14-35 days after tumor implantation.
